# Supplementary material
Source: PubMed Central journal article supplement (PMC8959997)
Supplement: NIHMS1788128-supplement-Supplemental.pdf [file NIHMS1788128-supplement-Supplemental.pdf]

## Supplementary information

### Supplementary method

#### *Bioinformatics analysis*

The Gene Ontology (GO) program Blast2GO (<https://www.blast2go.com/>) was used to annotate DEPs (differential expression proteins) to create histograms of GO annotations, including cell components, biological processes, and molecular functions.

For pathway analysis, the differentially proteins were mapped to the terms in the KEGG (Kyoto Encyclopedia of Genes and Genomes) database by using the KAAS program ([http://www.genome.jp/kaas-bin/kaas\\_main](http://www.genome.jp/kaas-bin/kaas_main)).

Protein-protein interaction networks were analyzed using the publicly available program STRING (<http://string-db.org/>) and minimum required interaction score set 0.400. STRING is a database of known and predicted protein-protein interactions. The interactions include direct (physical) and indirect (functional) associations, and they are derived from four sources: the genomic context, high-throughput experiments, co-expression, and previous knowledge.

## Supplementary figures

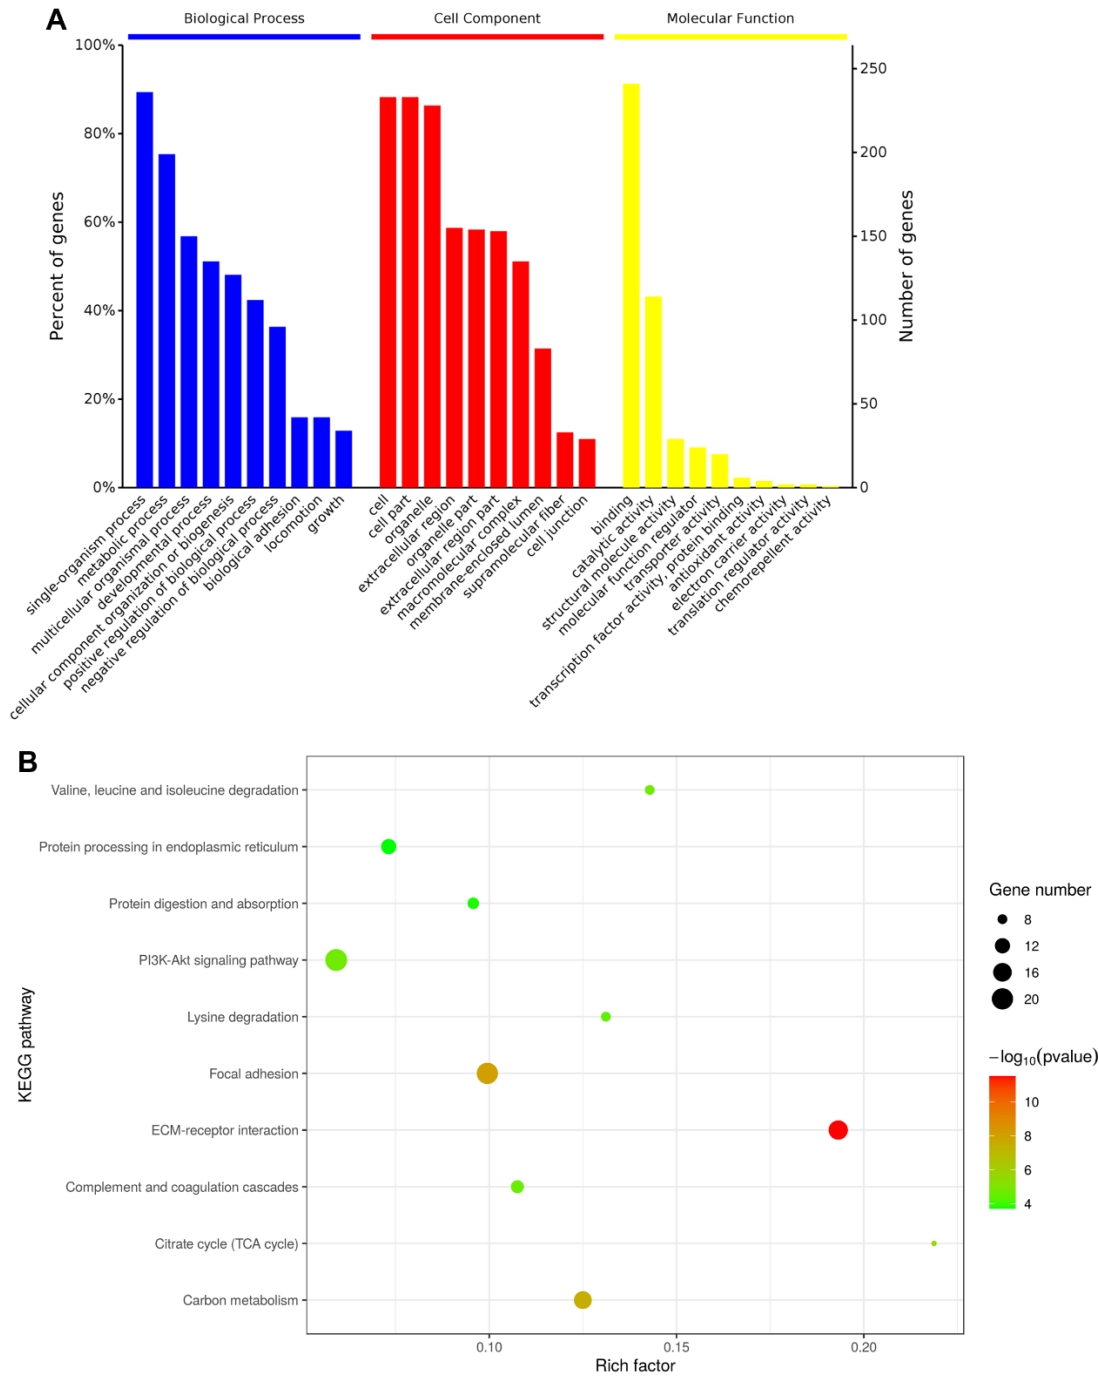

**Figure S1.** The GO analysis (A) and KEGG pathway annotation (B) for the differentially expressed protein comparisons in the young and newborn groups.



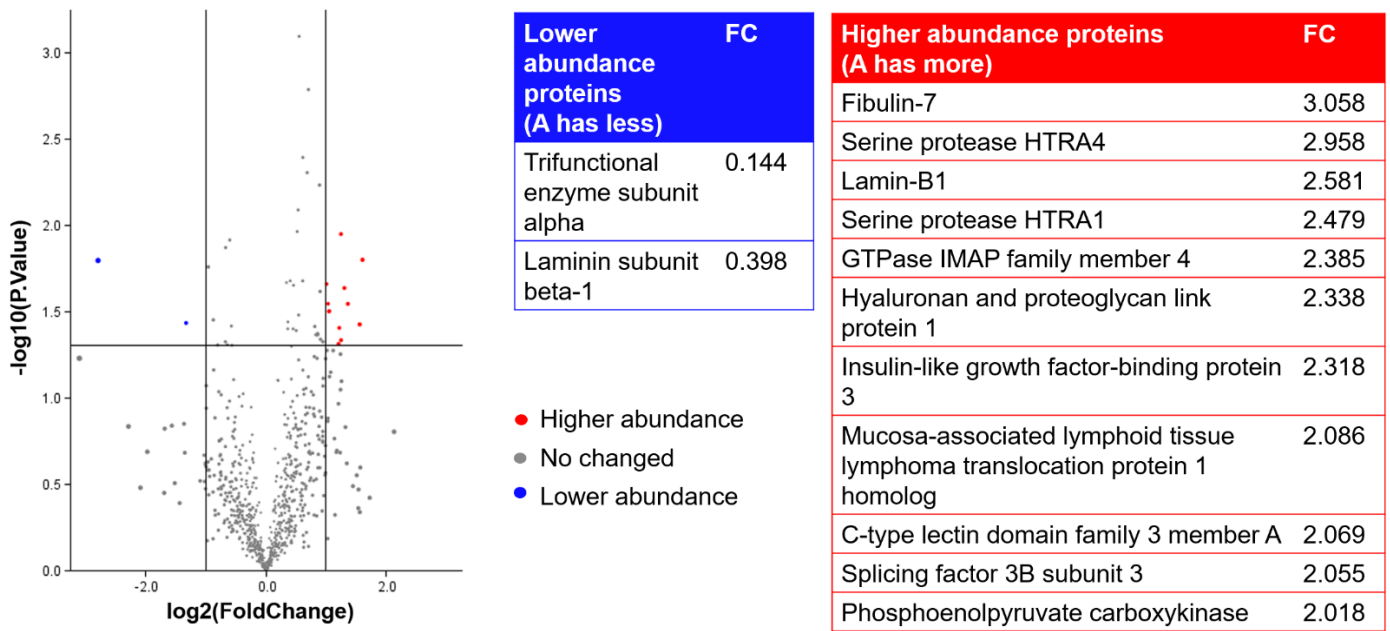

**Figure S3.** The volcano plot of proteins in the adult and young groups. The blue dots represent the lower abundance proteins in the adult group compared with the young group. The red dots represent the higher abundance proteins in the adult group compared with the young group. The gray dots show the proteins with no difference between the two groups. The top 20 lower and top 20 higher proteins are listed (FC: fold change).

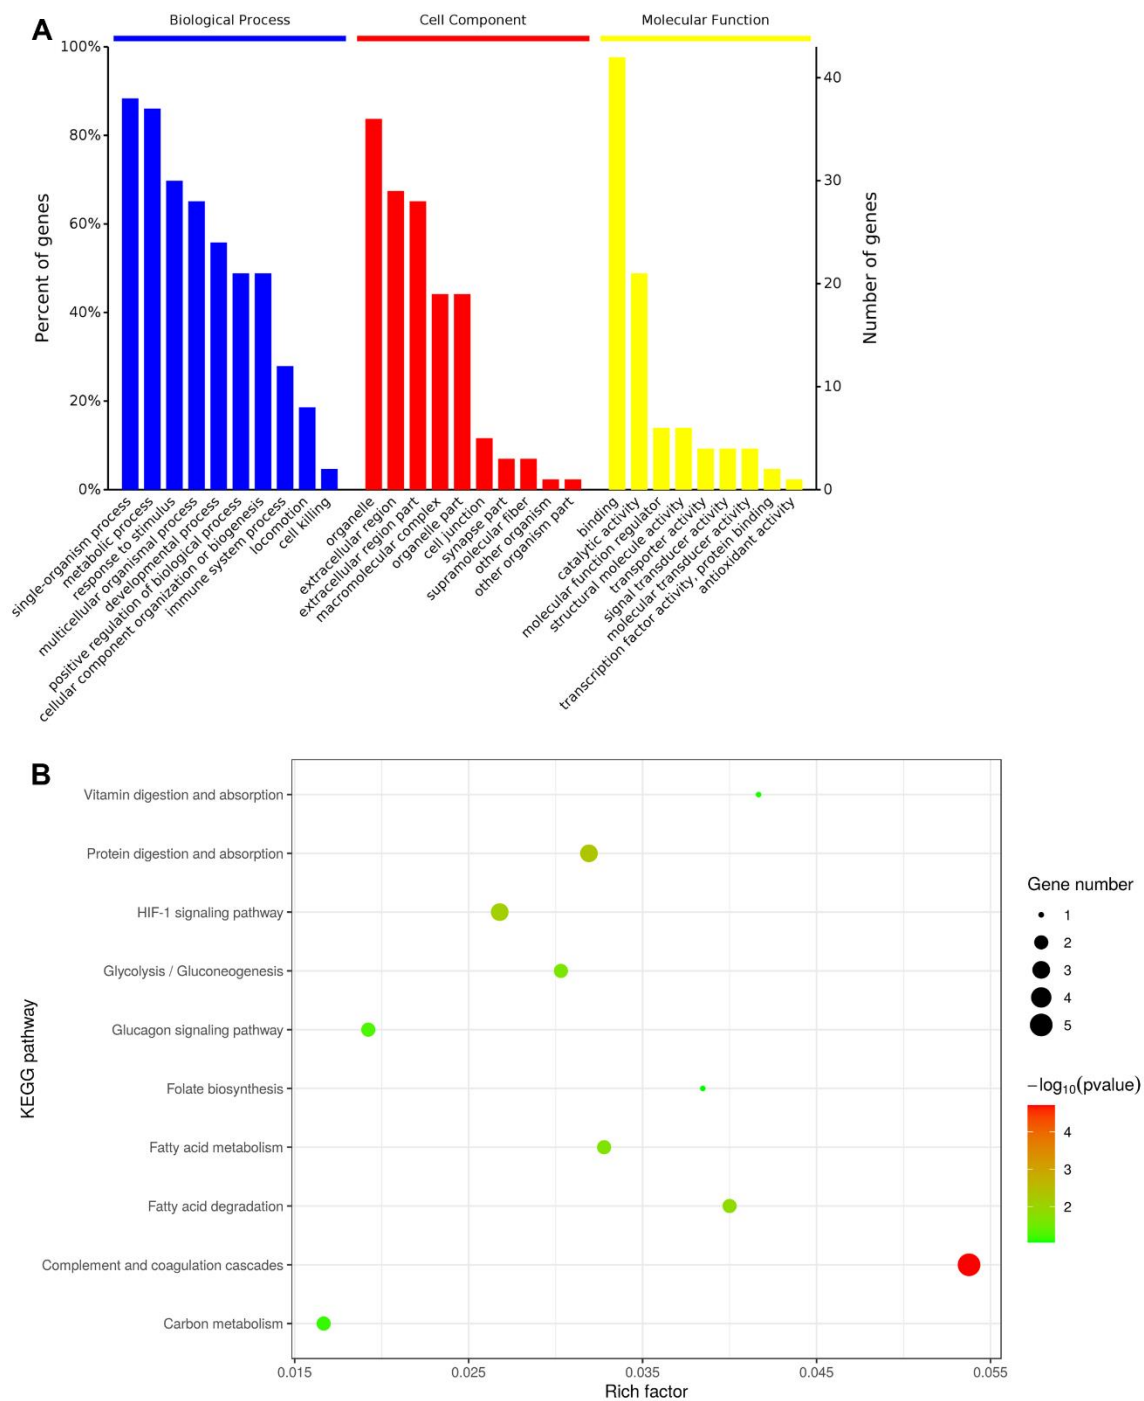

**Figure S4.** The GO analysis (A) and KEGG pathway annotation (B) for the differentially abundant protein comparison in the old and adult groups.

## Supplementary tables

**Table S1. Mass spectrometry data acquisition settings**

|                                  | DDA                                            | DIA                                            |
|----------------------------------|------------------------------------------------|------------------------------------------------|
| <i>Injection Mode</i>            | 5 $\mu$ L partial loop pickup                  | 5 $\mu$ L partial loop pickup                  |
| <i>Sample Loop</i>               | 20 $\mu$ L                                     | 20 $\mu$ L                                     |
| <i>Stationary Phase</i>          | Easy Spray, PepMap RSLC C18                    | Easy Spray PepMap RSLC C18                     |
|                                  | 100 $\text{\AA}$ , 3 $\mu$ m, 25 cm            | 100 $\text{\AA}$ , 3 $\mu$ m, 25 cm            |
| <i>LC Solvent A</i>              | 100% H <sub>2</sub> O,<br>0.1% formic acid     | 100% H <sub>2</sub> O,<br>0.1% formic acid     |
| <i>LC Solvent B</i>              | 100% MeCN,<br>0.1% formic acid                 | 100% MeCN,<br>0.1% formic acid                 |
|                                  | 2-25% 5-95 min                                 | 2-25% 5-95 min                                 |
| <i>LC Gradient</i>               | 25-55% 95-98 min                               | 25-55% 95-98 min                               |
|                                  | 55-85% 98-98.1 min                             | 55-85% 98-98.1 min                             |
| <i>LC Flow Rate</i>              | 300 nL/min                                     | 300 nL/min                                     |
| <i>Mass Spectrometer</i>         | Thermo Orbitrap Exploris 480                   | Thermo Orbitrap Exploris 480                   |
| <i>Method Type</i>               | Data dependent MS <sub>2</sub> , cycle time 3s | Data dependent MS <sub>2</sub> , cycle time 3s |
| <i>Spray Voltage</i>             | 2.0 kV                                         | 2.0 kV                                         |
| <i>Ion Transfer Temperature</i>  | 275 $^{\circ}$ C                               | 275 $^{\circ}$ C                               |
| <i>RV lens</i>                   | 40%                                            | 40%                                            |
| <i>MS<sup>1</sup> Detector</i>   | Orbitrap                                       | Orbitrap                                       |
| <i>MS<sup>1</sup> scan range</i> | 375-1800 m/z                                   | 380-985 m/z                                    |
| <i>MS<sup>1</sup> resolution</i> | 120,000                                        | 60,000                                         |
| <i>MS<sup>1</sup> AGC Target</i> | 300 %                                          | 100 %                                          |
| <i>MS<sup>1</sup> Maximum IT</i> | 100 ms                                         | 100 ms                                         |
| <i>MS<sup>2</sup> Detector</i>   | Orbitrap                                       | Orbitrap                                       |

|                                           |         |         |
|-------------------------------------------|---------|---------|
| <i>MS<sup>2</sup> resolution</i>          | 15,000  | 15,000  |
| <i>Isolation Window</i>                   | 1.6 m/z | 10 m/z  |
| <i>MS<sup>2</sup> AGC Target</i>          | 50%     | 200%    |
| <i>MS<sup>2</sup> Maximum IT</i>          | 40 ms   | 40 ms   |
| <i>Activation Type / Collision Energy</i> | HCD 28% | HCD 28% |
| <i>Intensity Threshold</i>                | 5e3     | NA      |
| <i>Dynamic Exclusion</i>                  | 36 s    | NA      |
| <i>Charge State Inclusion</i>             | +2-5    | NA      |
| <i>Window overlap</i>                     | NA      | 1 m/z   |
| <i>Window placement optimization</i>      | NA      | On      |
| <i># windows</i>                          | NA      | 59      |
| <i>Loop control</i>                       | NA      | N=30    |

**Table S2. Data Analysis settings**

| <i>Workflow</i>                 | DIA library                                      | DIA                                              |
|---------------------------------|--------------------------------------------------|--------------------------------------------------|
| <i>Platform</i>                 | Spectronaut 14                                   | Spectronaut 14                                   |
| <i>Search Algorithm</i>         | Pulsar™                                          | Spectral Matching                                |
| <i>Validation</i>               | Kernel Density Estimator                         | Kernel Density Estimator                         |
| <i>Database</i>                 | SwissProt; Mouse; Trypsin, created<br>12/12/2019 | SwissProt; Mouse; Trypsin, created<br>12/12/2019 |
| <i>Enzyme (semi/full)</i>       | Trypsin/P                                        | Trypsin/P                                        |
| <i>Missed Cleavages</i>         | 2                                                | 2                                                |
| <i>Precursor mass tolerance</i> | Dynamic                                          | Dynamic                                          |
| <i>Fragment mass tolerance</i>  | Dynamic                                          | Dynamic                                          |
| <i>Static Modifications</i>     | Methylthio (C)                                   | NA                                               |
| <i>Dynamic Modifications</i>    | Oxidation (M),<br>Acetylation (N-term)           | NA                                               |
| <i>Target FDR (Strict):</i>     | 0.01                                             | 0.01                                             |
| <i>Target FDR (Relaxed):</i>    | na                                               | na                                               |
| <i>Validation basis</i>         | q-value                                          | q-value                                          |
